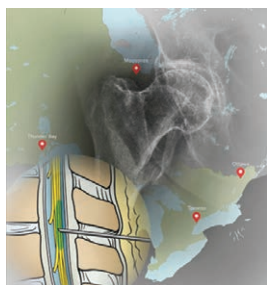

## ON THE COVER:

There is marked variation in use of neuraxial anesthesia for hip fracture surgery. In this issue of *ANESTHESIOLOGY*, McIsaac *et al.* report a population-based cohort study using administrative data in Ontario, Canada, to examine the association of utilization of neuraxial anesthesia with 30-day survival, length of stay, and costs. In an accompanying Editorial View, Chen and Neuman discuss these new research findings and their relationship to how we identify high-quality anesthetic care. Illustration by Sara Jarret, C.M.I.

- McIsaac *et al.*: Association of Hospital-level Neuraxial Anesthesia Use for Hip Fracture Surgery with Outcomes: A Population-based Cohort Study, p. 480
- Chen and Neuman: Do Anesthetic Choices Signal Quality? p. 429

|                                                                                                                                                                                                                                                                                                                                                                                                                                                                                                       |     |
|-------------------------------------------------------------------------------------------------------------------------------------------------------------------------------------------------------------------------------------------------------------------------------------------------------------------------------------------------------------------------------------------------------------------------------------------------------------------------------------------------------|-----|
| ◆ THIS MONTH IN ANESTHESIOLOGY                                                                                                                                                                                                                                                                                                                                                                                                                                                                        | 1A  |
| ■ SCIENCE, MEDICINE, AND THE ANESTHESIOLOGIST                                                                                                                                                                                                                                                                                                                                                                                                                                                         | 15A |
| ■ INFOGRAPHICS IN ANESTHESIOLOGY                                                                                                                                                                                                                                                                                                                                                                                                                                                                      | 19A |
| ◆ EDITORIAL VIEWS                                                                                                                                                                                                                                                                                                                                                                                                                                                                                     |     |
| <b>Do Anesthetic Choices Signal Quality?</b><br><i>C. L. Chen and M. D. Neuman</i>                                                                                                                                                                                                                                                                                                                                                                                                                    | 429 |
| <b>Artificial Intelligence for Everyone</b><br><i>P. Gambus and S. L. Shafer</i>                                                                                                                                                                                                                                                                                                                                                                                                                      | 431 |
| <b>Advancing Patient Safety in Airway Management</b><br><i>M. F. Aziz</i>                                                                                                                                                                                                                                                                                                                                                                                                                             | 434 |
| ■ PRACTICE PARAMETERS                                                                                                                                                                                                                                                                                                                                                                                                                                                                                 |     |
| ◆  <b>Practice Guidelines for Moderate Procedural Sedation and Analgesia 2018: A Report by the American Society of Anesthesiologists Task Force on Moderate Procedural Sedation and Analgesia, the American Association of Oral and Maxillofacial Surgeons, American College of Radiology, American Dental Association, American Society of Dentist Anesthesiologists, and Society of Interventional Radiology</b> | 437 |

◆ Refers to This Month in Anesthesiology

◆ Refers to Editorial Views

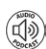

This article has an Audio Podcast

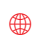

See Supplemental Digital Content

 CME Article

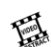

This article has a Video Abstract

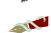

Part of the Letheon writing competition

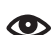

This article has a Visual Abstract

## ■ PERIOPERATIVE MEDICINE

## CLINICAL SCIENCE

## ◆ ◆ Association of Hospital-level Neuraxial Anesthesia Use for Hip Fracture

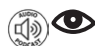

## Surgery with Outcomes: A Population-based Cohort Study

480

D. I. McIsaac, D. N. Wijeyesundera, A. Huang, G. L. Bryson, and C. van Walraven

Across hospitals in Ontario, Canada, the rate of neuraxial anesthesia use for hip fracture surgery varied from 0 to 100%. Hospitals performing neuraxial anesthesia for more than 20 to 25% of their patients demonstrated improved survival compared to hospitals performing below that threshold.

## ◆ ◆ Prediction of Bispectral Index during Target-controlled Infusion of Propofol and Remifentanyl: A Deep Learning Approach

492

H.-C. Lee, H.-G. Ryu, E.-J. Chung, and C.-W. Jung

An empirical model was developed from propofol and remifentanyl dosing histories and demographic data to predict bispectral index during total intravenous anesthesia target-controlled infusions using a deep learning approach. The deep learning model had less error in predicting bispectral index during anesthesia induction, maintenance, and recovery periods than the response surface model. The generalizability of the deep learning model is very dependent on the training data set.

## ◆ ◆ Temporal Trends in Difficult and Failed Tracheal Intubation in a Regional Community Anesthetic Practice

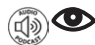

502

R. A. Schroeder, R. Pollard, I. Dhakal, M. Cooter, S. Aronson, K. Grichnik, W. Buhrman, M. D. Kertai, J. P. Mathew, and M. Stafford-Smith

The rate of difficult and failed tracheal intubation has decreased significantly from 2002 to 2015. The role of specific devices, techniques, algorithms, and other practice changes requires further investigation.

◆ Effect of Thoracic Epidural Ropivacaine *versus* Bupivacaine on Lower Urinary Tract Function: A Randomized Clinical Trial

511

S. A. Girsberger, M. P. Schneider, L. M. Löffel, F. C. Burkhard, and P. Y. Wuethrich

Postvoid bladder volume was less with ropivacaine than bupivacaine, and urine flow was better maintained. Ropivacaine is preferable to bupivacaine for bladder function and may prevent catheterization in some patients.

## Four Types of Pulse Oximeters Accurately Detect Hypoxia during Low Perfusion and Motion

520

A. Louie, J. R. Feiner, P. E. Bickler, L. Rhodes, M. Bernstein, and J. Lucero

This study determined the performance of four pulse oximeters (Masimo Radical-7, USA; Nihon Kohden OxyPal Neo, Japan; Nellcor N-600, USA; and Philips Intellivue MP5, USA) in 10 healthy adult volunteers. All oximeters detected hypoxemia during motion and low-perfusion conditions, but motion impaired performance at all ranges, with less accuracy at lower arterial oxygen saturation. Lower perfusion degraded performance in all but the Nihon Kohden instrument.

## ◆ Physiologic Evaluation of Ventilation Perfusion Mismatch and Respiratory Mechanics at Different Positive End-expiratory Pressure in Patients Undergoing Protective One-lung Ventilation

531

S. Spadaro, S. Grasso, D. S. Karbing, A. Fogagnolo, M. Contoli, G. Bollini, R. Ragazzi, G. Cinnella, M. Verri, N. G. Cavallero, S. E. Rees, and C. A. Volta

Shunt fraction and ventilation/perfusion ratio ( $\dot{V}/\dot{Q}$ ) distribution was measured in 41 patients undergoing one-lung anesthesia. Positive end-expiratory pressure at 5 or 10 cm H<sub>2</sub>O, applied in random order, resulted in lower shunt fraction and driving pressure, without increasing dead space.

## BASIC SCIENCE

## Bupivacaine Indirectly Potentiates Glutamate-induced Intracellular Calcium Signaling in Rat Hippocampal Neurons by Impairing Mitochondrial Function in Cocultured Astrocytes

539

Y. Xing, N. Zhang, W. Zhang, and L.-M. Ren

At clinically relevant concentrations, bupivacaine impaired mitochondrial function and reduced mitochondrial membrane potential in astrocytes but not in neurons. Astrocyte glutamate uptake was decreased by bupivacaine. The results suggest that, by reducing astrocyte glutamate uptake, bupivacaine increases neuronal exposure to glutamate, thereby causing excitotoxic injury.

## Sevoflurane Blocks the Induction of Long-term Potentiation When Present during, but Not When Present Only before, the High-frequency Stimulation

555

J. Liu, L. Yang, D. Lin, J. E. Cottrell, and I. S. Kass

Sevoflurane administration during the stimulation that induces long-term potentiation also reduced long-term potentiation, a model for memory formation, in the hippocampus. Long-term potentiation was not blocked if sevoflurane was discontinued before the stimulus that induces long-term potentiation. The results suggest that sevoflurane can suppress memory formation only during its administration. The persistent effects on signal transduction do not prevent the recovery of memory formation.

### ■ CRITICAL CARE MEDICINE

#### BASIC SCIENCE

## L-arginine and Arginase Products Potentiate Dexmedetomidine-induced Contractions in the Rat Aorta

564

E. S. W. Wong, R. Y. K. Man, K. F. J. Ng, S. W. S. Leung, and P. M. Vanhoutte

These results suggest that when vascular nitric oxide homeostasis is impaired, the potentiation of the vasoconstrictor effect of dexmedetomidine by L-arginine depends on arginase activity and the production of urea and ornithine.

## 🌐 Astrocytic N-Myc Downstream-regulated Gene-2 Is Involved in Nuclear Transcription Factor $\kappa$ B-mediated Inflammation Induced by Global Cerebral Ischemia

574

Y. Deng, Y. Ma, Z. Zhang, L. Zhang, H. Guo, P. Qin, Y. Hou, Z. Gao, and W. Hou

In *in vitro* cocultures of astrocytes and neurons, inhibition of nuclear transcription factor  $\kappa$ B (NF- $\kappa$ B) or knockdown of N-Myc downstream-regulated gene-2 (NDRG2) in astrocytes reduced neuronal apoptosis. Similarly, inhibition of NF- $\kappa$ B *in vivo* reduced neuronal injury and better preserved learning and memory function in rodents. The results suggest that suppression of astrocyte-mediated inflammation can improve neuronal survival and that NDRG2 may serve as a pharmacologic target for the improvement of outcome after cerebral ischemia.

### ■ PAIN MEDICINE

#### CLINICAL SCIENCE

## 🌐 Targeted Genotyping Identifies Susceptibility Locus in Brain-derived Neurotrophic Factor Gene for Chronic Postsurgical Pain

587

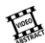

Y. Tian, X. Liu, M. Jia, H. Yu, P. Lichtner, Y. Shi, Z. Meng, S. Kou, I. H. T. Ho, B. Jia, B. C. P. Cheng, C. K. M. Lam, S. Tsang, S. H. Wong, J. Yu, C. H. K. Cheng, T. Gin, W. K. K. Wu, Z. Chen, M. T. V. Chan; for the Persistent Pain after Surgery Study Investigators

Among more than 1,000 surgical patients, 21% reported chronic postsurgical pain 12 months after surgery. Patients were genotyped for 638 single nucleotide polymorphisms in 54 pain-related genes, with 23 and 19 polymorphisms associated with increased and decreased pain, respectively, including a polymorphism in brain-derived neurotrophic factor associated with lower risk. Mice with the brain-derived neurotrophic factor polymorphism had less nociceptive response to a surgical incision compared with wild-type animals.

## Using Activity Trackers to Quantify Postpartum Ambulation: A Prospective Observational Study of Ambulation after Regional Anesthesia and Analgesia Interventions

598

J. Ma, R. Martin, B. Chan, M. Gofeld, M. P. Geary, J. G. Laffey, and F. W. Abdallah

This study objectively demonstrates that vaginal delivery is associated with greater early ambulation and functional recovery compared to cesarean delivery. It also establishes the feasibility of using activity trackers to evaluate early postoperative ambulation after neuraxial anesthesia and analgesia.

## BASIC SCIENCE

**Pharmacodynamics and Pharmacokinetics of Lidocaine in a Rodent Model of Diabetic Neuropathy**

609

*W. ten Hoope, M. W. Hollmann, K. de Bruin, H. J. Verberne, A. O. Verkerk, H. L. Tan, C. Verhamme, J. Horn, M. Rigaud, S. Picardi, and P. Lirk*

Rats with neuropathy secondary to type 2 diabetes had prolonged nerve block duration compared to control rats. Radiolabeled lidocaine concentrations were higher in the nerves of diabetic rats 60 min after nerve block, when most diabetic nerves are still blocked. The ED<sub>50</sub> of lidocaine for motor block in diabetic rats was 64% of that of control animals. The *in vitro* inhibitory effect of a given lidocaine concentration was much more pronounced in primary sensory neurons harvested from diabetic rats.

**Transcriptional Changes in Dorsal Spinal Cord Persist after Surgical Incision Despite Preemptive Analgesia with Peripheral Resiniferatoxin**

620

*S. J. Raithel, M. R. Sapio, D. M. LaPaglia, M. J. Iadarola, and A. J. Mannes*

Using a rat model of postsurgical pain, it was shown that a single localized injection of resiniferatoxin reduced evoked and nonevoked pain-related behaviors over the entire period of postoperative recovery. Analysis of spinal cord dorsal horn tissue revealed that resiniferatoxin pretreatment did not block most changes in gene expression, including the expression of genes associated with microglia, despite reducing pain-related behaviors.

## ■ EDUCATION

## IMAGES IN ANESTHESIOLOGY

**Intraoral Lipomas**

636

*E. Nguyen, G. Sarah, and M. B. Ferschl***A Large Anterior Mediastinal Mass**

637

*J. Stubblefield, T. Moon, and J. Griffin*

## ORIGINAL INVESTIGATION IN EDUCATION

**Relaxation before Debriefing during High-fidelity Simulation Improves Memory Retention of Residents at Three Months: A Prospective Randomized Controlled Study**

638

*M. Lilot, J.-N. Evain, C. Bauer, J.-C. Cejka, A. Faure, B. Balanço, O. Vassal, C. Payet, B. Bui Xuan, A. Duclos, J.-J. Lehot, and T. Rimmelé*

This investigation tested whether residents in a simulation would better recall critical key messages at three months when a relaxation break occurred before debriefing. More residents (71 *vs.* 46%) recalled three or more messages at three months when there was a relaxation break compared with controls. Results suggest that relaxation as a cognitive technique may enhance learning.

## CLINICAL FOCUS REVIEW

**Use of Uncrossmatched Erythrocytes in Emergency Bleeding Situations**

650

*M. H. Yazer, J. H. Waters, P. C. Spinella; on behalf of the AABB (formerly known as the American Association of Blood Banks)/Trauma Hemostasis Oxygenation Resuscitation Network (THOR) Working Party*

Transfusion of uncrossmatched erythrocytes is lifesaving in patients who are severely bleeding when crossmatched erythrocytes are unavailable. The hemolysis risk after uncrossmatched erythrocyte administration to appropriate patients is very low.

## REVIEW ARTICLE

**Antifibrinolytic Therapy and Perioperative Considerations**

657

*J. H. Levy, A. Koster, Q. J. Quinones, T. J. Milling, and N. S. Key*

Fibrinolysis is important for hemostatic balance, but after trauma or surgery may contribute to coagulopathy and bleeding. Antifibrinolytic agents reduce bleeding and transfusions, and tranexamic acid is the agent most extensively studied and administered.

## MIND TO MIND

-  **Hospital Waiting Room** 671  
A. Chenevert
- Then It Was Dark and Cold** 672  
J. Harnden

## CORRESPONDENCE

- Does the Brachial Artery Lack Effective Collaterals?** 674  
T. A. Bowdle and R. Sheu

**In Reply**  
A. Singh, B. J. Wakefield, and A. E. Duncan

- Effect of Spinal *versus* General Anesthesia in Study Comparing Three Methods of Using Local Anesthetics to Achieve Post-knee Arthroplasty Pain** 676  
J. Riopelle

**In Reply**  
A. W. Amundson, R. L. Johnson, D. R. Schroeder, and S. L. Kopp

- “A Message in the Bottle”** 677  
L. Vetrugno, E. Brogi, F. Barbariol, F. Forfori, and E. Bignami

- Impact of Weaning from Mechanical Ventilation: The Importance of Pleural Effusions and Their Effect on Pulmonary Vascular Resistance** 677  
E. Jacobsohn and H. P. Grocott

- Accurate Quantification of Pleural Effusion and Cofactors Affecting Weaning Failure** 678  
Y. Iwasaki, S. Ohshimo, and N. Shime

**In Reply**  
M. Dres and A. Demoule

- One Size Fits All for Stress-dose Steroids** 680  
D. B. Wax

**In Reply**  
M. M. Liu, A. B. Reidy, S. Saatee, and C. D. Collard

- Volume Responsiveness Alone Is Not an Indication for Volume Administration!** 681  
J. A. Bloomstone, L. H. Navarro e Lima, and G. Kramer

- Goal-directed Hemodynamic Therapy: Neither for Anyone, Neither the Same for Everyone** 682  
J. Ripollés-Melchor and C. Aldecoa

**In Reply**  
J. C. Gómez-Izquierdo, A. Trainito, D. Mirzakandov, B. L. Stein, A. S. Liberman, P. Charlebois, N. Pecorelli, L. S. Feldman, F. Carli, and G. Baldini

- Statin Therapy before Cardiac Surgery: Neutral or Detrimental Effects?** 685  
A. Putzu, M. Gallo, E. Ferrari, T. Cassina, and G. Landoni

## CONTENTS

### Neurocritical Care Needs Predictive Scores That Succeed at Predicting Failure as Well as They Predict Success

*J. Patlak, S. Shaefi, L. Buhl, and M. D. Boone*

686

### In Reply

*R. Cinotti, A. Roquilly, and K. Asehnoune*

### ■ REVIEWS OF EDUCATIONAL MATERIAL

688

### ■ ANNOUNCEMENTS

690

### ■ ERRATUM

692

### ■ CAREERS & EVENTS

23A

## INSTRUCTIONS FOR AUTHORS

The most recently updated version of the Instructions for Authors is available at [www.anesthesiology.org](http://www.anesthesiology.org). Please refer to the Instructions for the preparation of any material for submission to ANESTHESIOLOGY.

Manuscripts submitted for consideration for publication must be submitted in electronic format. The preferred method is via the Journal's Web site (<http://www.anesthesiology.org>). Detailed directions for submissions and the most recent version of the Instructions for Authors can be found on the Web site (<http://www.anesthesiology.org>). Books and educational materials should be sent to Alan Jay Schwartz, M.D., M.S.Ed., Director of Education, Department of Anesthesiology and Critical Care Medicine, The Children's Hospital of Philadelphia, 34th Street and Civic Center Blvd., Room 9327, Philadelphia, Pennsylvania 19104-4399. Requests for permission to duplicate materials published in ANESTHESIOLOGY should be submitted in electronic format, to the Permissions Department ([journalpermissions@lww.com](mailto:journalpermissions@lww.com)). Advertising and related correspondence should be addressed to Advertising Manager, ANESTHESIOLOGY, Wolters Kluwer Health, Inc., Two Commerce Square, 2001 Market Street, Philadelphia, Pennsylvania 19103 (Web site: <http://www.wkacenter.com/>). Publication of an advertisement in ANESTHESIOLOGY does not constitute endorsement by the Society or Wolters Kluwer Health, Inc. of the product or service described therein or of any representations made by the advertiser with respect to the product or service.

**ANESTHESIOLOGY** (ISSN 0003-3022) is published monthly by Wolters Kluwer Health, Inc., 14700 Citicorp Drive, Bldg 3, Hagerstown, MD 21742. Business office: Two Commerce Square, 2001 Market Street, Philadelphia, PA 19103. Periodicals postage paid at Hagerstown, MD, and at additional mailing offices. Copyright © 2018, the American Society of Anesthesiologists, Inc.

**Annual Subscription Rates:** *United States*—\$930 Individual, \$2054 Institution, \$374 In-training. *Rest of World*—\$981 Individual, \$2281 Institution, \$374 In-training. Single copy rate \$207. Subscriptions outside of North America must add \$55 for airfreight delivery. Add state sales tax, where applicable. The GST tax of 7% must be added to all orders shipped to Canada (Wolters Kluwer Health, Inc.'s GST Identification #895524239, Publications Mail Agreement #1119672). Indicate in-training status and name of institution. Institution rates apply to libraries, hospitals, corporations, and partnerships of three or more individuals. Subscription prices outside the United States must be prepaid. Prices subject to change without notice. Subscriptions will begin with currently available issue unless otherwise requested. Visit us online at [www.lww.com](http://www.lww.com).

Individual and in-training subscription rates include print and access to the online version. Online-only subscriptions for individuals (\$308) and persons in training (\$308) are available to nonmembers and may be ordered by downloading a copy of the Online Subscription FAXback Form from the Web site, completing the information requested, and faxing the completed form to 301-223-2400. Institutional rates are for print only; online subscriptions are available via Ovid. Institutions can choose to purchase a print and online subscription together for a discounted rate. Institutions that wish to purchase a print subscription, please contact Wolters Kluwer Health, Inc., 14700 Citicorp Drive, Bldg 3, Hagerstown, MD 21742; phone: 800-638-3030; fax: 301-223-2400. Institutions that wish to purchase an online

subscription or online with print, please contact the Ovid Regional Sales Office near you or visit [www.ovid.com/site/index.jsp](http://www.ovid.com/site/index.jsp) and select Contact and Locations.

**Address for non-member subscription information, orders, or change of address** (except Japan): Wolters Kluwer Health, Inc., 14700 Citicorp Drive, Bldg 3, Hagerstown, MD 21742; phone: 800-638-3030; fax: 301-223-2400. In Japan, contact Wolters Kluwer Health Japan Co., Ltd., Forecast Mita Building 5th floor, 1-3-31 Mita Minato-ku, Tokyo, Japan 108-0073; phone: +81 3 5427 1969; email: [journal@wkjapan.co.jp](mailto:journal@wkjapan.co.jp).

**Address for member subscription information, orders, or change of address:** Members of the American Society of Anesthesiologists receive the print and online journal with their membership. To become a member or provide a change of address, please contact the American Society of Anesthesiologists, 1061 American Lane, Schaumburg, Illinois 60173-4973; phone: 847-825-5586; fax: 847-825-1692; email: [membership@ASAhq.org](mailto:membership@ASAhq.org). For all other membership inquiries, contact Wolters Kluwer Health, Inc., Customer Service Department, P.O. Box 1610, Hagerstown, MD 21740; phone: 800-638-3030; fax: 301-223-2400.

**Postmaster:** Send address changes to ANESTHESIOLOGY, P.O. BOX 1610, Hagerstown, MD 21740.

**Advertising:** Please contact Hilary Druker, Advertising Field Sales Representative, Health Learning, Research & Practice, Medical Journals, Wolters Kluwer Health, Inc.; phone: 609-304-9187; e-mail: [Hilary.Druker@wolterskluwer.com](mailto:Hilary.Druker@wolterskluwer.com). For classified advertising: Joe Anzuena, Recruitment Advertising Representative, Wolters Kluwer Health, Inc., Two Commerce Square, 2001 Market Street, Philadelphia, PA 19103; phone: 215-521-8532; fax: 215-701-2410; e-mail: [Joe.Anzuena@wolterskluwer.com](mailto:Joe.Anzuena@wolterskluwer.com).
